# Supplementary material for: Classical Mathematical Models for Description and Prediction of Experimental Tumor Growth
Source: PLOS journal article supplement (doi:10.1371/journal.pcbi.1003800), 2014-08-28

**Figure S2: Examples of individual predictions.**

**A. Gompertz model (similar to von Bertalanffy, dynamic CC and power law models)**

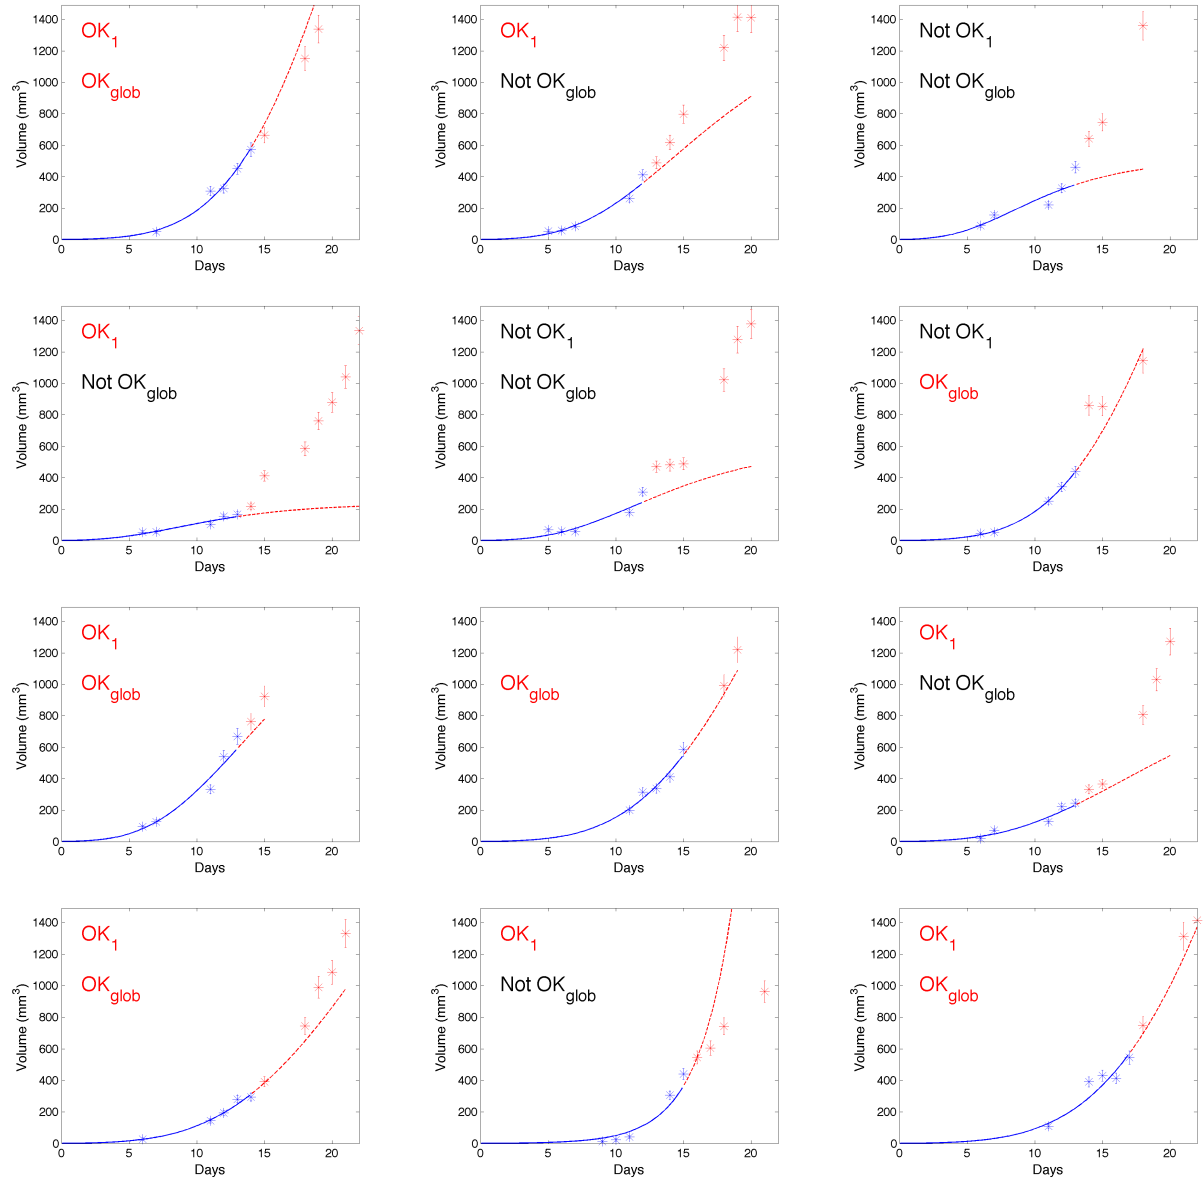

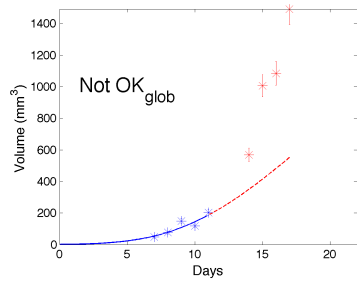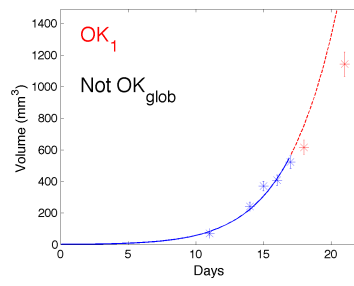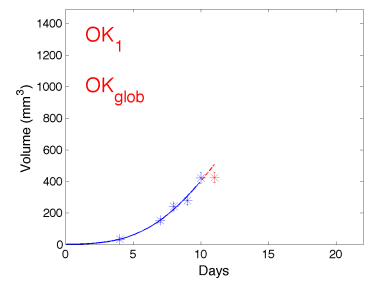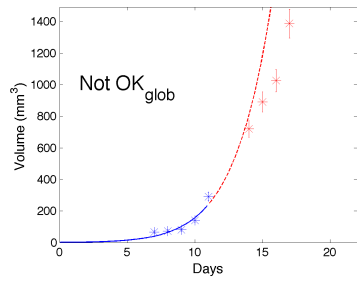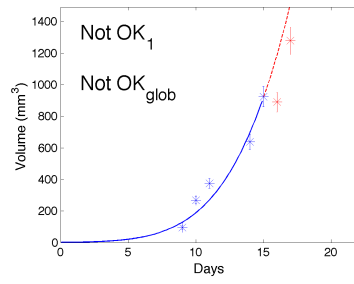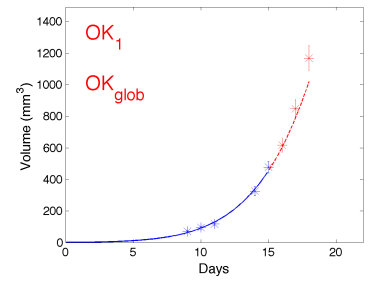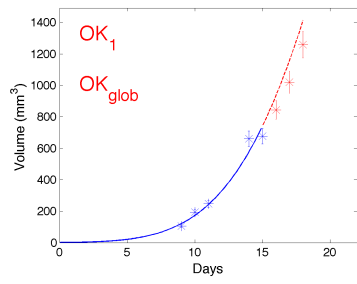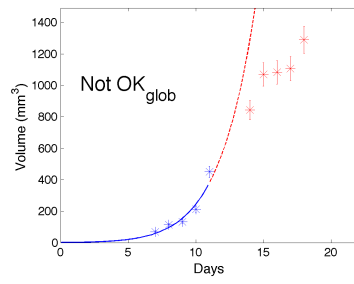

## B. Examples of sharp saturation of the generalized logistic model

Mouse 12

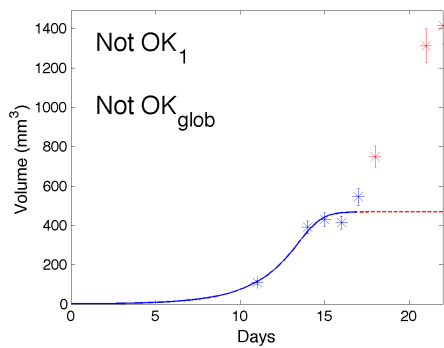

Mouse 14

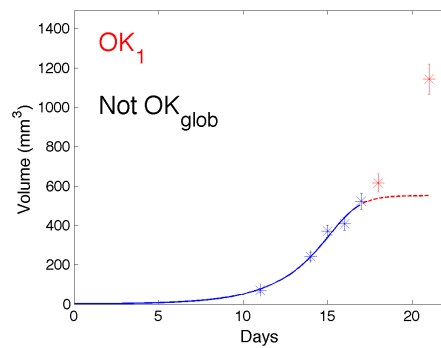

Mouse 17

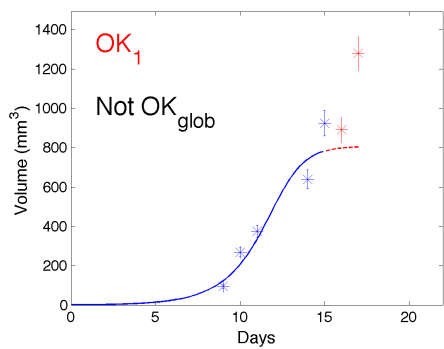

Mouse 19

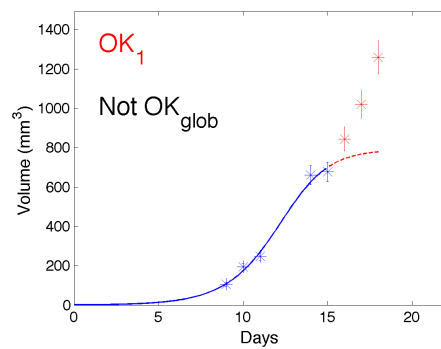

Supplement: S2 (10.1371/journal.pcbi.1003800.s002) [file journal.pcbi.1003800.s002]
